# Supplementary material for: Modulation of the driving forces for adsorption on MIL-101 analogues by decoration with sulfonic acid functional groups: superior selective adsorption of hazardous anionic dyes
Source: Royal Society of Chemistry journal article supplement (doi:10.1039/d0dt00978d), 2020-01-01
Supplement: d0dt00978d1.pdf [file d0dt00978d1.pdf]

*Electronic Supplementary Information (ESI)*

**Modulation of the driving forces for adsorption of MIL-101 analogues  
by decoration with sulfonic acid functional groups: Superior selective  
adsorption of hazardous anionic dyes**

Ji-Min Yang\*, Wei Zhang, Run-Zhi Zhang and Meng-Xuan Tong

*School of Chemistry & Chemical Engineering, Linyi University, Linyi 276005, China*

\* Corresponding author: Tel.: +86 539 7258620; fax: +86 539 7258620; e-mail:

yangjimin@lyu.edu.cn

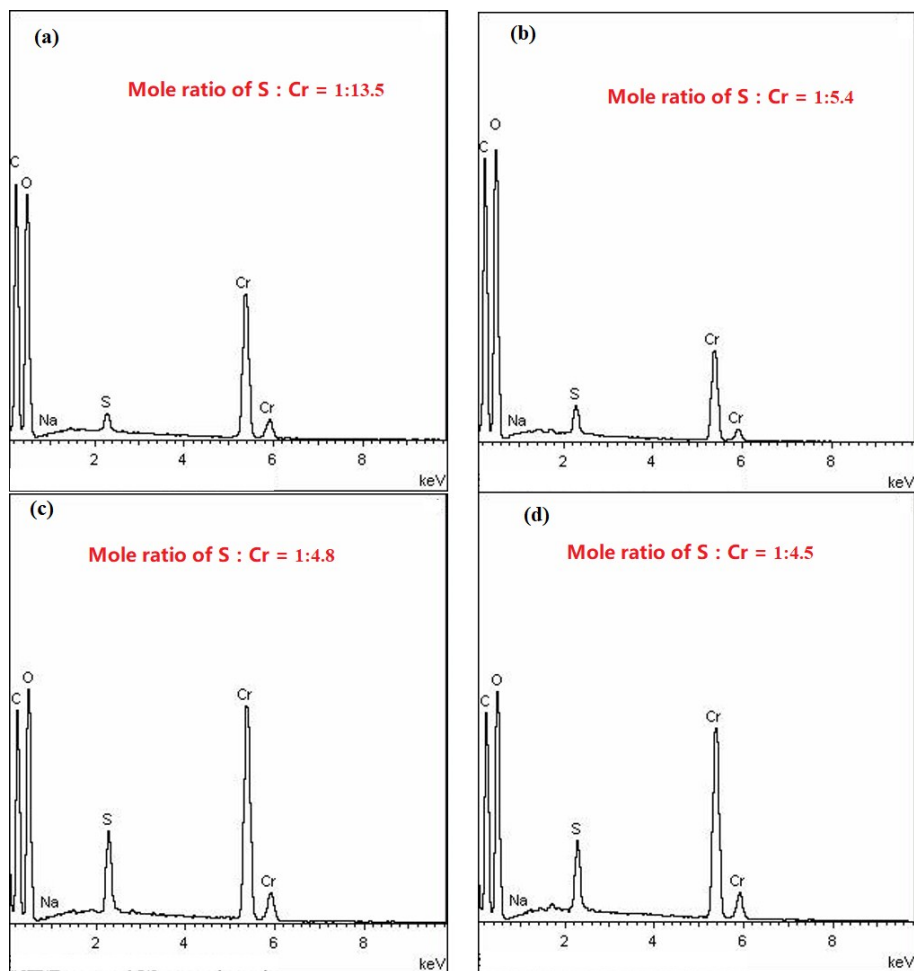

**Fig. S1** EDS spectra of MIL-101-SO<sub>3</sub>H products synthesized with different mole ratio of H<sub>2</sub>BDC-SO<sub>3</sub>Na : H<sub>2</sub>BDC: (a) 1 : 9, (b) 2 : 8, (c) 3 : 7 and (d) 4 : 6..

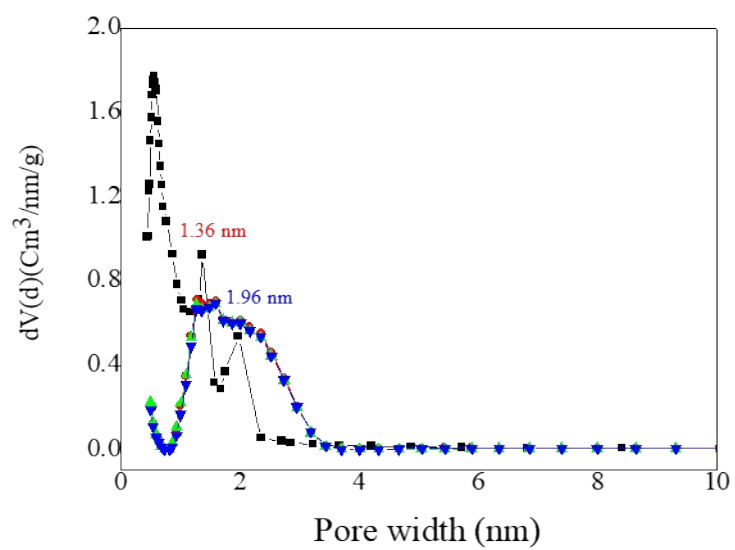

**Fig. S2** The pore size distributions of MIL-101-SO<sub>3</sub>H.

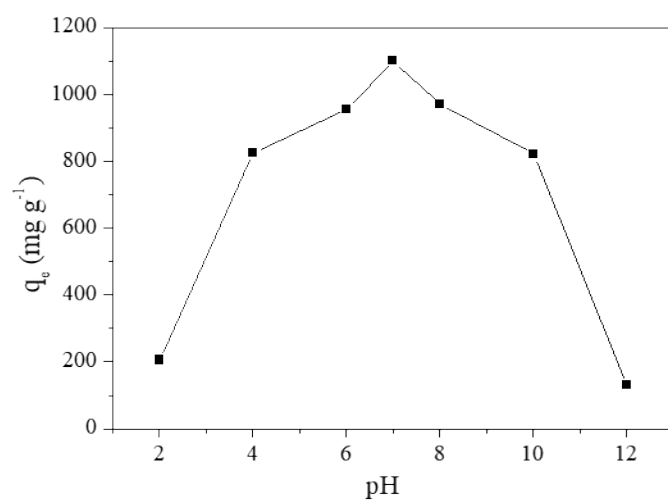

**Fig. S3** Effect of pH on CR adsorption on the MIL-101-SO<sub>3</sub>H-1 microcrystals.

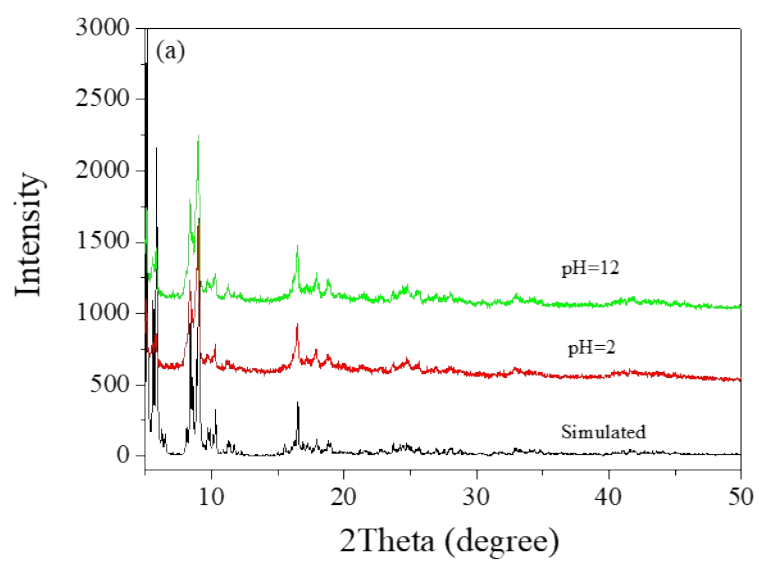

**Fig. S4** Simulated and experimental powder XRD patterns at different pH.

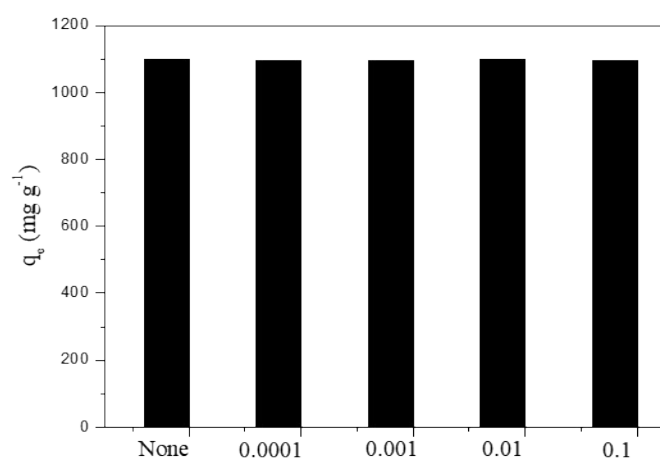

**Fig. S5** Adsorption capacity of CR with different concentrations of  $\text{Na}^+$  ion.

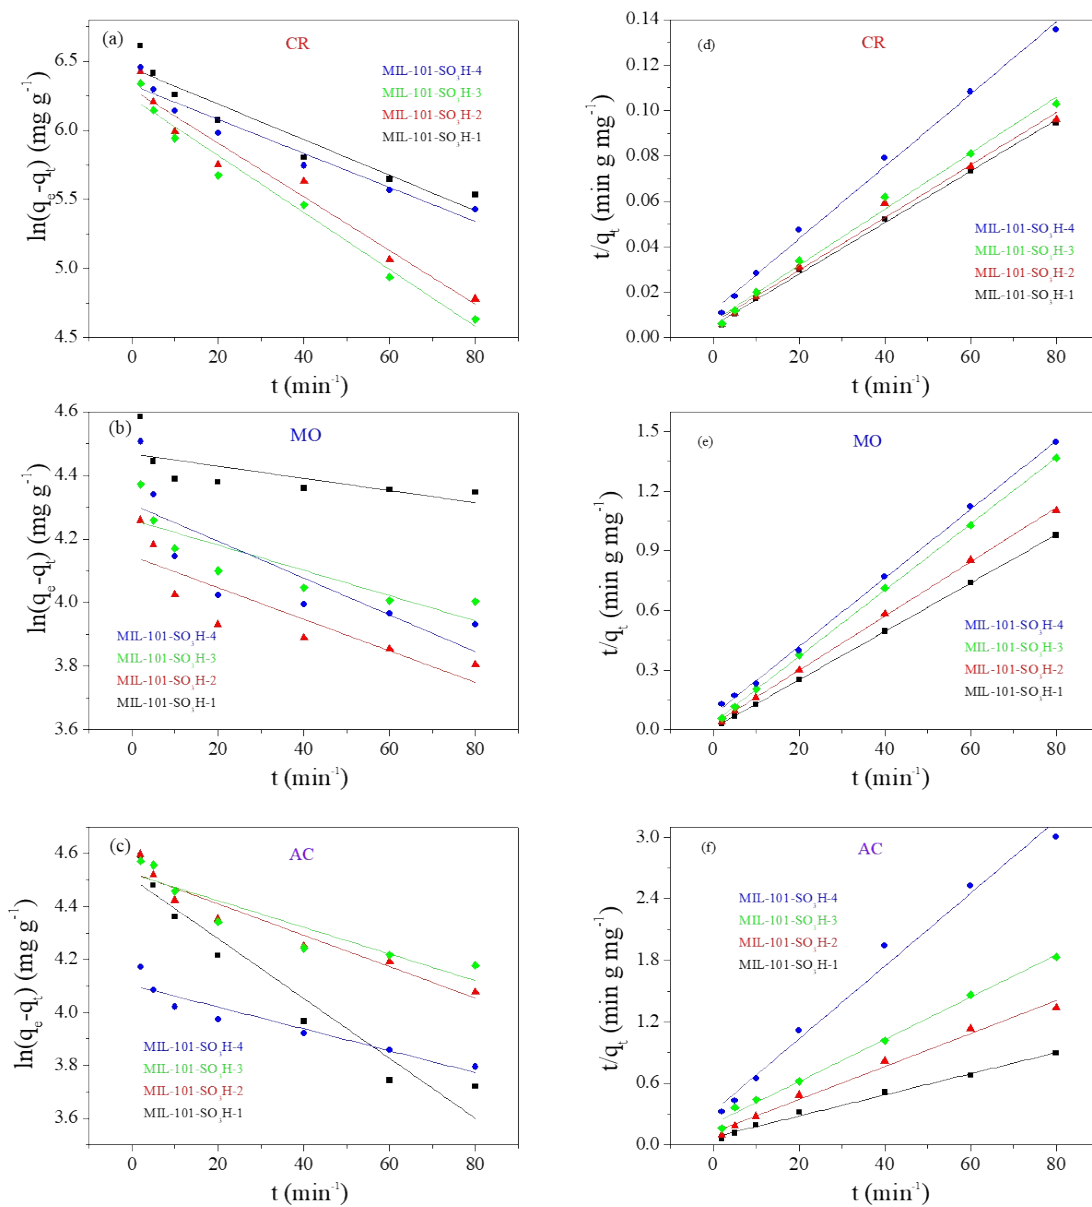

**Fig. S6** (a–c) Pseudo-first-order and (d–f) pseudo-second-order fits of the experimental adsorption kinetic data.

**Table S1** Characteristic parameters of the adsorption of dyes on the MIL-101-SO<sub>3</sub>H-1.

|                        |                                    | parameters                                                       | CR                   | MO                   | AC                   |
|------------------------|------------------------------------|------------------------------------------------------------------|----------------------|----------------------|----------------------|
| Adsorption kinetics    | Pseudo-first-order                 | $q_{e,Exp}$ (mg g <sup>-1</sup> )                                | 1099.2               | 158.9                | 130.9                |
|                        |                                    | $q_{e,Cal}$ (mg g <sup>-1</sup> )                                | 630.6                | 82.2                 | 90.4                 |
|                        |                                    | $k_1$ (min <sup>-1</sup> )                                       | 0.0129               | 0.0019               | 0.0113               |
|                        |                                    | $R^2$                                                            | 0.8958               | 0.3541               | 0.9237               |
|                        | Pseudo-second-order                | $q_{e,Exp}$ (mg g <sup>-1</sup> )                                | 1099.2               | 158.9                | 130.9                |
|                        |                                    | $q_{e,Cal}$ (mg g <sup>-1</sup> )                                | 884.9                | 87.1                 | 97.1                 |
|                        |                                    | $k_2$ (g mg <sup>-1</sup> min <sup>-1</sup> )                    | $2.4 \times 10^{-4}$ | $1.8 \times 10^{-2}$ | $1.4 \times 10^{-3}$ |
|                        |                                    | $R^2$                                                            | 0.9977               | 0.9999               | 0.9926               |
| Adsorption isotherm    | Tempkin                            | $A$ (L g <sup>-1</sup> )                                         | 9.9                  | 1.5                  | 40.9                 |
|                        |                                    | $B$                                                              | 346.4                | 110.3                | 22.1                 |
|                        |                                    | $R^2$                                                            | 0.9680               | 0.8775               | 0.9513               |
|                        | Freundlich                         | $n$                                                              | 3.1                  | 3.4                  | 7.8                  |
|                        |                                    | $k_F$ (mg g <sup>-1</sup> (L mg <sup>-1</sup> ) <sup>1/n</sup> ) | 553.0                | 135.9                | 100.0                |
|                        |                                    | $R^2$                                                            | 0.9219               | 0.7941               | 0.9621               |
|                        | Langmuir                           | $q_{m,Exp}$ (mg g <sup>-1</sup> )                                | 2592.7               | 688.9                | 213.2                |
|                        |                                    | $q_{m,Cal}$ (mg g <sup>-1</sup> )                                | 2620.8               | 699.3                | 219.3                |
|                        |                                    | $b$ (L mg <sup>-1</sup> )                                        | 0.2327               | 0.0607               | 0.0802               |
|                        |                                    | $R^2$                                                            | 0.9994               | 0.9977               | 0.9990               |
| Thermodynamic constant | $\Delta G$ (kJ mol <sup>-1</sup> ) | -3.6                                                             | -6.9                 | -6.3                 |                      |



**Table S2** Characteristic parameters of the adsorption of dyes on the MIL-101-SO<sub>3</sub>H-2.

|                        |                                    | parameters                                                       | CR                   | MO                   | AC                   |
|------------------------|------------------------------------|------------------------------------------------------------------|----------------------|----------------------|----------------------|
| Adsorption kinetics    | Pseudo-first-order                 | $q_{e,Exp}$ (mg g <sup>-1</sup> )                                | 952.9                | 117.4                | 118.9                |
|                        |                                    | $q_{e,Cal}$ (mg g <sup>-1</sup> )                                | 542.3                | 63.2                 | 62.3                 |
|                        |                                    | $k_1$ (min <sup>-1</sup> )                                       | 0.0194               | 0.0049               | 0.0059               |
|                        |                                    | $R^2$                                                            | 0.9528               | 0.7016               | 0.9142               |
|                        | Pseudo-second-order                | $q_{e,Exp}$ (mg g <sup>-1</sup> )                                | 952.9                | 117.4                | 118.9                |
|                        |                                    | $q_{e,Cal}$ (mg g <sup>-1</sup> )                                | 862.1                | 73.4                 | 92.5                 |
|                        |                                    | $k_2$ (g mg <sup>-1</sup> min <sup>-1</sup> )                    | $2.0 \times 10^{-4}$ | $6.9 \times 10^{-3}$ | $2.1 \times 10^{-3}$ |
|                        |                                    | $R^2$                                                            | 0.9891               | 0.9993               | 0.9865               |
| Adsorption isotherm    | Tempkin                            | $A$ (L g <sup>-1</sup> )                                         | 7.2                  | 0.4                  | 1035.1               |
|                        |                                    | $B$                                                              | 260.7                | 100.2                | 12.5                 |
|                        |                                    | $R^2$                                                            | 0.9660               | 0.9642               | 0.8791               |
|                        | Freundlich                         | $n$                                                              | 3.4                  | 1.5                  | 11.3                 |
|                        |                                    | $k_F$ (mg g <sup>-1</sup> (L mg <sup>-1</sup> ) <sup>1/n</sup> ) | 427.4                | 75.3                 | 94.8                 |
|                        |                                    | $R^2$                                                            | 0.8075               | 0.9411               | 0.8942               |
|                        | Langmuir                           | $q_{m,Exp}$ (mg g <sup>-1</sup> )                                | 1962.0               | 550.4                | 165.1                |
|                        |                                    | $q_{m,Cal}$ (mg g <sup>-1</sup> )                                | 1993.9               | 578.0                | 169.2                |
|                        |                                    | $b$ (L mg <sup>-1</sup> )                                        | 0.1276               | 0.0199               | 0.0692               |
|                        |                                    | $R^2$                                                            | 0.9971               | 0.9737               | 0.9982               |
| Thermodynamic constant | $\Delta G$ (kJ mol <sup>-1</sup> ) | -5.1                                                             | -9.7                 | -6.6                 |                      |

**Table S3** Characteristic parameters of the adsorption of dyes on the MIL-101-SO<sub>3</sub>H-3.

|                        |                                    | parameters                                                       | CR                   | MO                   | AC                   |
|------------------------|------------------------------------|------------------------------------------------------------------|----------------------|----------------------|----------------------|
| Adsorption kinetics    | Pseudo-first-order                 | $q_{e,Exp}$ (mg g <sup>-1</sup> )                                | 880.1                | 113.3                | 105.9                |
|                        |                                    | $q_{e,Cal}$ (mg g <sup>-1</sup> )                                | 507.6                | 60.1                 | 48.7                 |
|                        |                                    | $k_1$ (min <sup>-1</sup> )                                       | 0.0206               | 0.0039               | 0.0050               |
|                        |                                    | $R^2$                                                            | 0.9702               | 0.6819               | 0.8266               |
|                        | Pseudo-second-order                | $q_{e,Exp}$ (mg g <sup>-1</sup> )                                | 880.1                | 113.3                | 105.9                |
|                        |                                    | $q_{e,Cal}$ (mg g <sup>-1</sup> )                                | 813.1                | 70.8                 | 92.0                 |
|                        |                                    | $k_2$ (g mg <sup>-1</sup> min <sup>-1</sup> )                    | $2.1 \times 10^{-4}$ | $7.6 \times 10^{-3}$ | $2.0 \times 10^{-3}$ |
|                        |                                    | $R^2$                                                            | 0.9919               | 0.9997               | 0.9936               |
| Adsorption isotherm    | Tempkin                            | $A$ (L g <sup>-1</sup> )                                         | 4.1                  | 0.6                  | 21801.1              |
|                        |                                    | $B$                                                              | 243.8                | 70.2                 | 8.4                  |
|                        |                                    | $R^2$                                                            | 0.9645               | 0.9731               | 0.9007               |
|                        | Freundlich                         | $n$                                                              | 3.2                  | 3.4                  | 14.4                 |
|                        |                                    | $k_F$ (mg g <sup>-1</sup> (L mg <sup>-1</sup> ) <sup>1/n</sup> ) | 335.8                | 68.2                 | 88.3                 |
|                        |                                    | $R^2$                                                            | 0.7868               | 0.9813               | 0.9182               |
|                        | Langmuir                           | $q_{m,Exp}$ (mg g <sup>-1</sup> )                                | 1699.1               | 423.3                | 138.9                |
|                        |                                    | $q_{m,Cal}$ (mg g <sup>-1</sup> )                                | 1732.4               | 440.5                | 140.3                |
|                        |                                    | $b$ (L mg <sup>-1</sup> )                                        | 0.1087               | 0.0230               | 0.0772               |
|                        |                                    | $R^2$                                                            | 0.9966               | 0.9889               | 0.9979               |
| Thermodynamic constant | $\Delta G$ (kJ mol <sup>-1</sup> ) | -5.5                                                             | -9.3                 | -6.3                 |                      |

**Table S4** Characteristic parameters of the adsorption of dyes on the MIL-101-SO<sub>3</sub>H-4.

|                        |                                    | parameters                                                       | CR                   | MO                   | AC                   |
|------------------------|------------------------------------|------------------------------------------------------------------|----------------------|----------------------|----------------------|
| Adsorption kinetics    | Pseudo-first-order                 | $q_{e,Exp}$ (mg g <sup>-1</sup> )                                | 817.1                | 106.2                | 71.1                 |
|                        |                                    | $q_{e,Cal}$ (mg g <sup>-1</sup> )                                | 588.3                | 58.7                 | 28.2                 |
|                        |                                    | $k_1$ (min <sup>-1</sup> )                                       | 0.0123               | 0.0058               | 0.0041               |
|                        |                                    | $R^2$                                                            | 0.9271               | 0.5678               | 0.8750               |
|                        | Pseudo-second-order                | $q_{e,Exp}$ (mg g <sup>-1</sup> )                                | 817.1                | 106.2                | 71.1                 |
|                        |                                    | $q_{e,Cal}$ (mg g <sup>-1</sup> )                                | 628.9                | 74.3                 | 60.5                 |
|                        |                                    | $k_2$ (g mg <sup>-1</sup> min <sup>-1</sup> )                    | $2.1 \times 10^{-4}$ | $3.9 \times 10^{-3}$ | $3.8 \times 10^{-3}$ |
|                        |                                    | $R^2$                                                            | 0.9947               | 0.9990               | 0.9845               |
| Adsorption isotherm    | Tempkin                            | $A$ (L g <sup>-1</sup> )                                         | 2.18                 | 0.48                 | $2.1 \times 10^4$    |
|                        |                                    | $B$                                                              | 197.6                | 63.2                 | 12.1                 |
|                        |                                    | $R^2$                                                            | 0.9564               | 0.9767               | 0.9239               |
|                        | Freundlich                         | $n$                                                              | 2.9                  | 3.3                  | 7.6                  |
|                        |                                    | $k_F$ (mg g <sup>-1</sup> (L mg <sup>-1</sup> ) <sup>1/n</sup> ) | 207.6                | 57.5                 | 49.7                 |
|                        |                                    | $R^2$                                                            | 0.94487              | 0.9801               | 0.9571               |
|                        | Langmuir                           | $q_{m,Exp}$ (mg g <sup>-1</sup> )                                | 1281.8               | 357.9                | 116.5                |
|                        |                                    | $q_{m,Cal}$ (mg g <sup>-1</sup> )                                | 1332.1               | 378.8                | 119.0                |
|                        |                                    | $b$ (L mg <sup>-1</sup> )                                        | 0.0656               | 0.0210               | 0.0378               |
|                        |                                    | $R^2$                                                            | 0.9974               | 0.9839               | 0.9916               |
| Thermodynamic constant | $\Delta G$ (kJ mol <sup>-1</sup> ) | -6.8                                                             | -9.6                 | -8.1                 |                      |

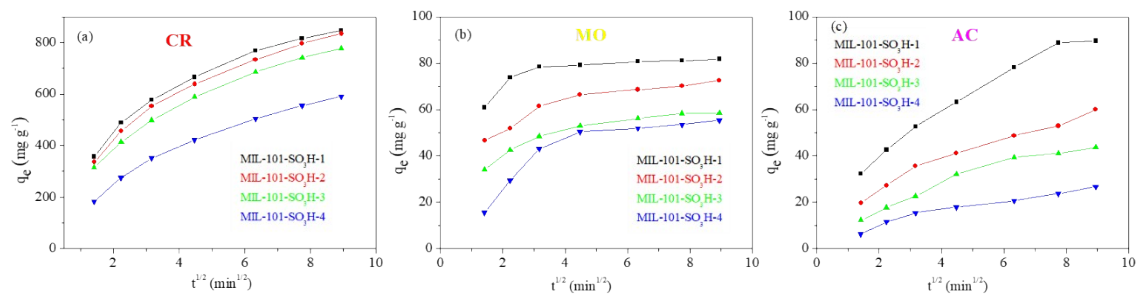

**Fig. S7** Weber–Morris intra-particle diffusion plots for the adsorption of (a) CR, (b) MO and (c) AC on the MIL-101-SO<sub>3</sub>H micro/nanoparticles.

**Table S5** Summary of CR maximum adsorption capacities ( $q$ ) on various adsorbents.

| Type of adsorbent                                           | $q$ (mg g <sup>-1</sup> ) | Reference |
|-------------------------------------------------------------|---------------------------|-----------|
| MIL-101-SO <sub>3</sub> H-1                                 | 2592.7                    | This work |
| MIL-101-SO <sub>3</sub> H-2                                 | 1962.0                    | This work |
| UiO-67                                                      | 1236.9                    | 39        |
| MIL-68(In)                                                  | 1204                      | 40        |
| Ni-Cu-BTC                                                   | 999.2                     | 41        |
| Mesoporous alumina fibers                                   | 781.3                     | 42        |
| [Co(L <sub>2</sub> )(Htp)(tp) <sub>0.5</sub> ] <sub>n</sub> | 629.6                     | 43        |
| Hierarchical hollow NiO                                     | 440                       | 44        |
| α-FeOOH                                                     | 275                       | 45        |
| Activated carbon                                            | 200                       | 46        |

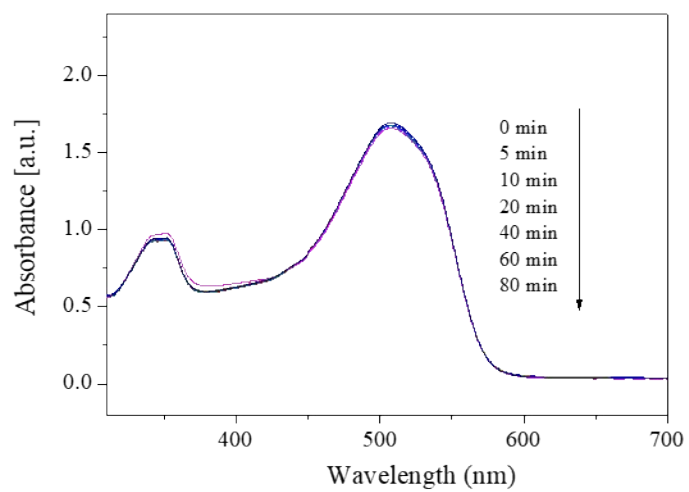

**Fig. S8** The adsorption rate with MIL-101(Cr) (5 mg) for SD (20 mg/L, 50 mL).

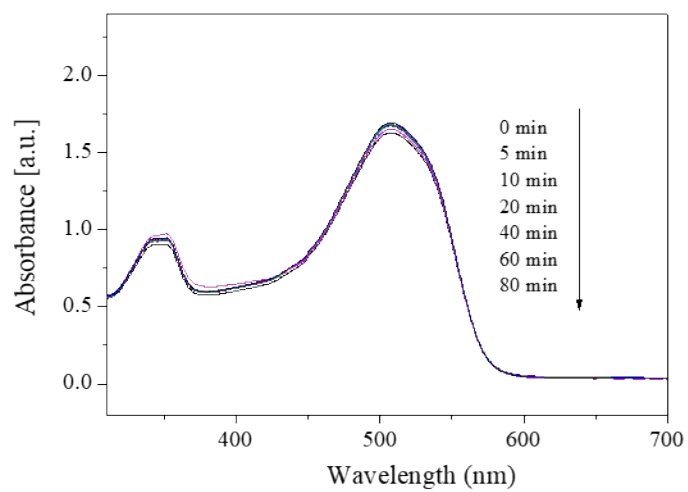

**Fig. S9** The adsorption rate with MIL-101-SO<sub>3</sub>H-1 (5 mg) for SD (20 mg/L, 50 mL).

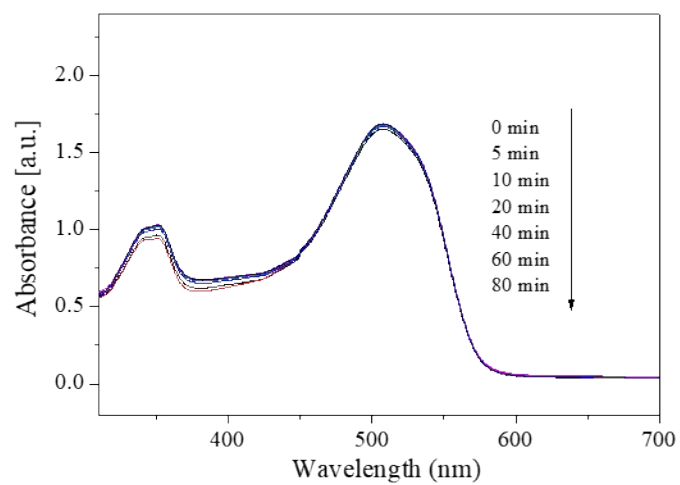

**Fig. S10** The adsorption rate with MIL-101-SO<sub>3</sub>H-4 (5 mg) for SD (20 mg/L, 50 mL).



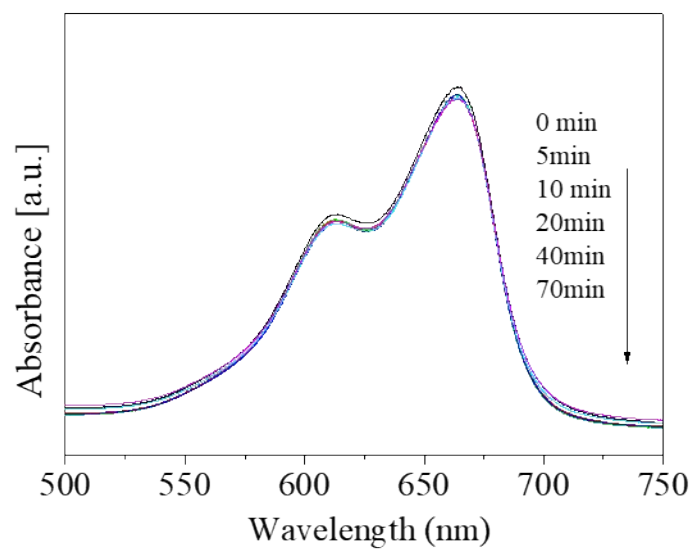

**Fig. S11** The adsorption rate with MIL-101(Cr) (5 mg) for MB (20 mg/L, 50 mL).

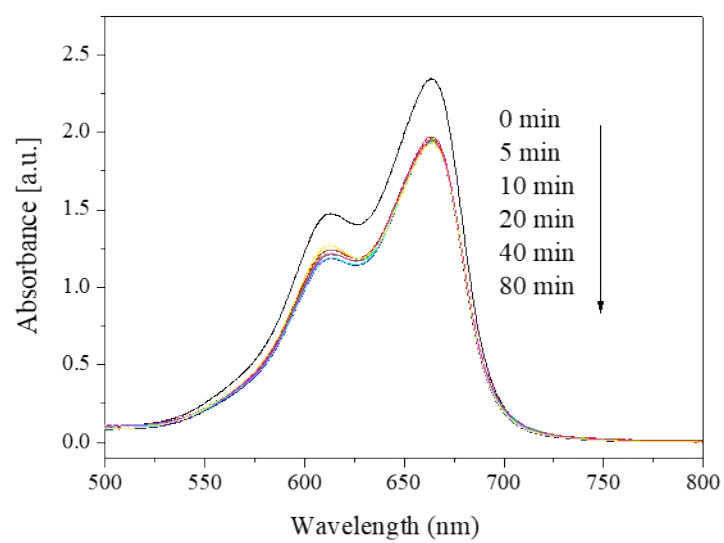

**Fig. S12** The adsorption rate with MIL-101-SO<sub>3</sub>H-1 (5 mg) for MB (20 mg/L, 50 mL).

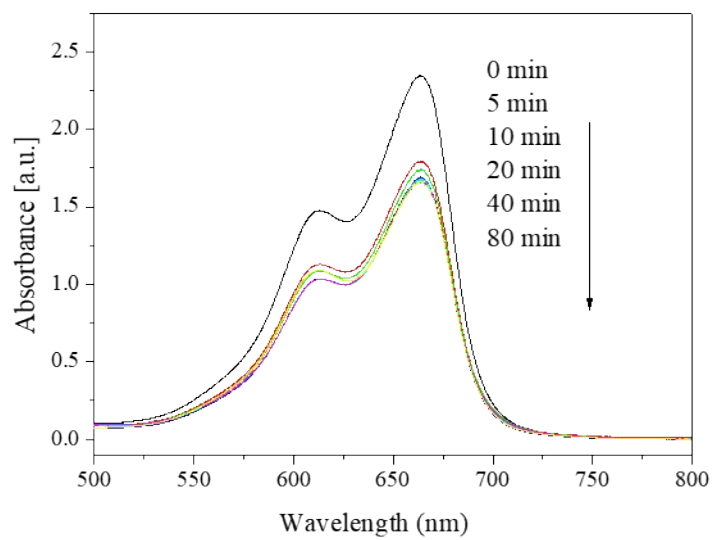

**Fig. S13** The adsorption rate with MIL-101-SO<sub>3</sub>H-4 (5 mg) for MB (20 mg/L, 50 mL).

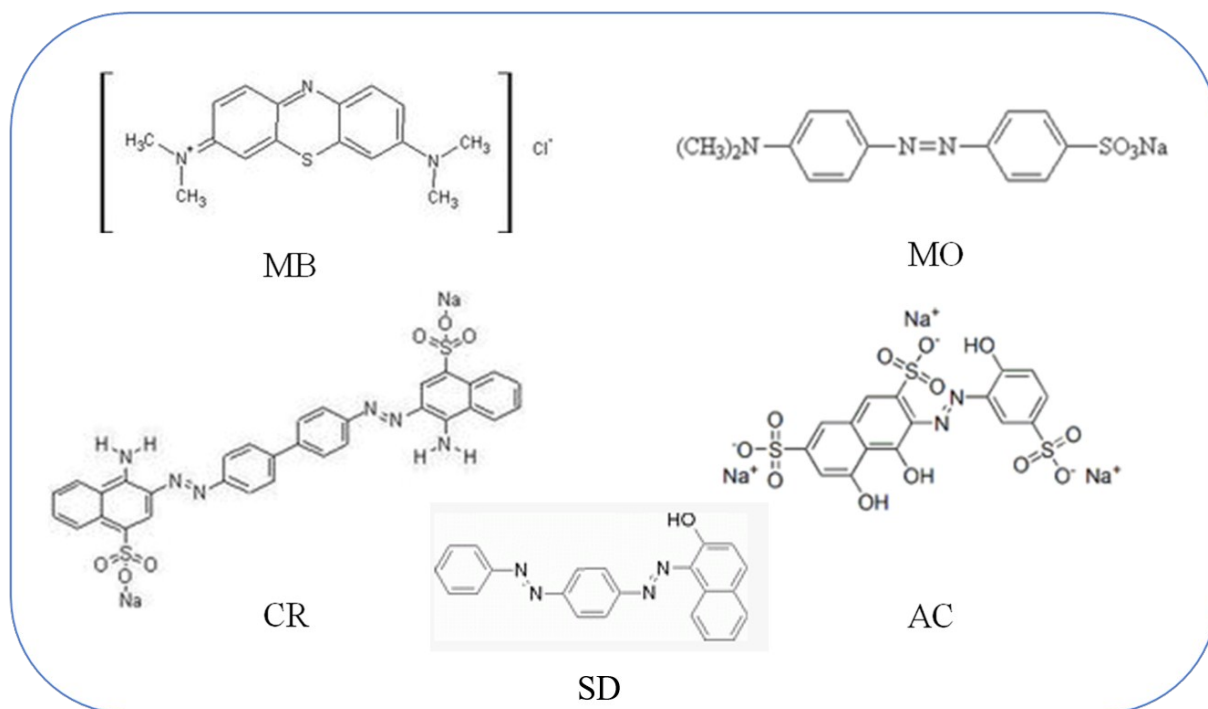

**Fig. S14** Molecular structures of the investigated dyes.

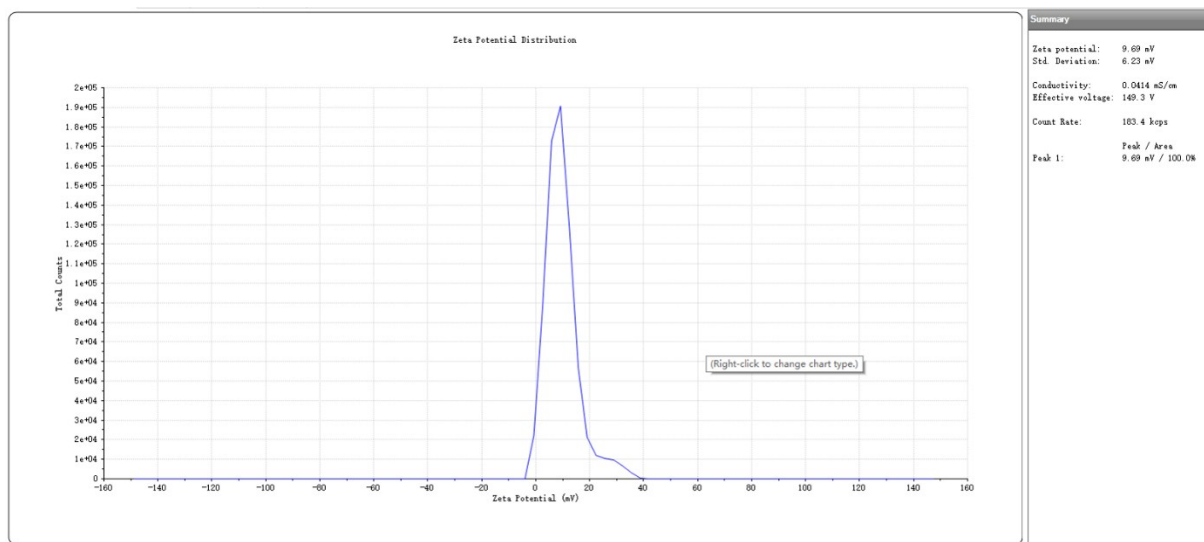

**Fig. S15** Zeta potential of MIL-101-SO<sub>3</sub>H-1 microparticles directly dispersed in water.

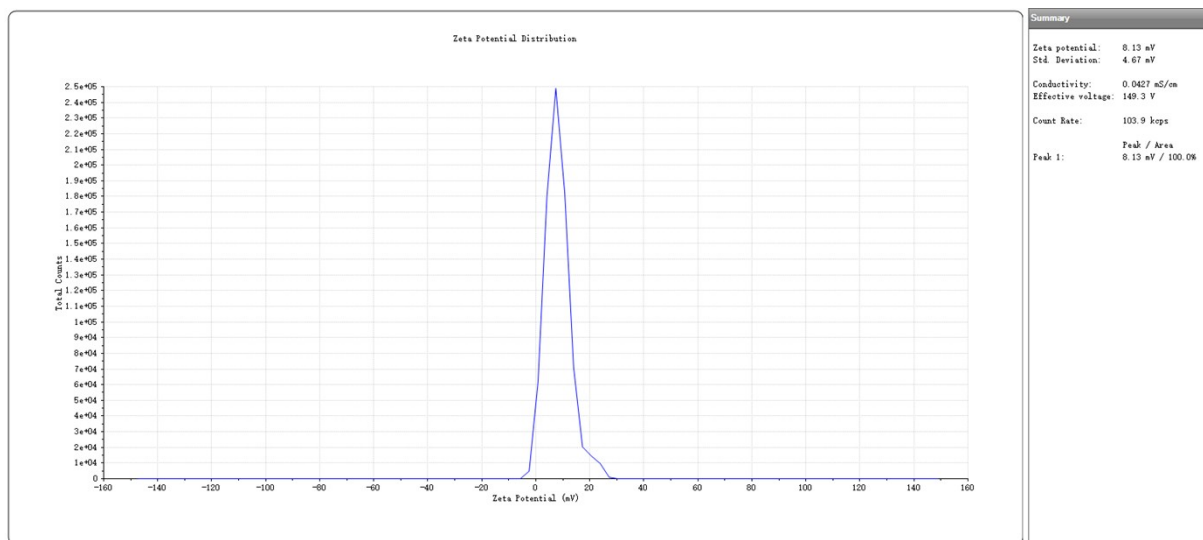

**Fig. S16** Zeta potential of MIL-101-SO<sub>3</sub>H-2 microparticles directly dispersed in water.

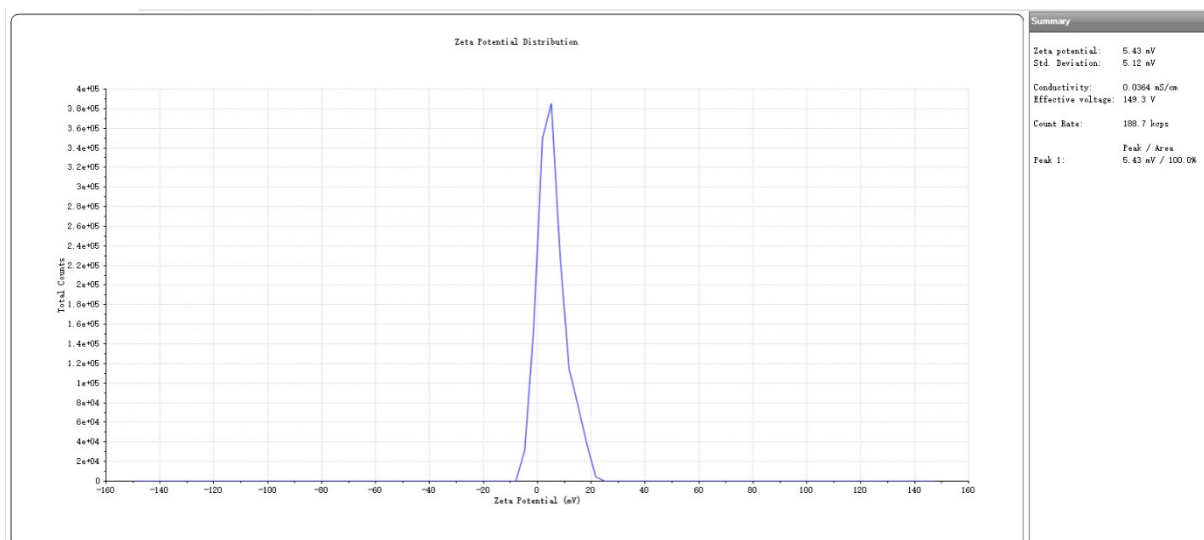

**Fig. S17** Zeta potential of MIL-101-SO<sub>3</sub>H-3 microparticles directly dispersed in water.

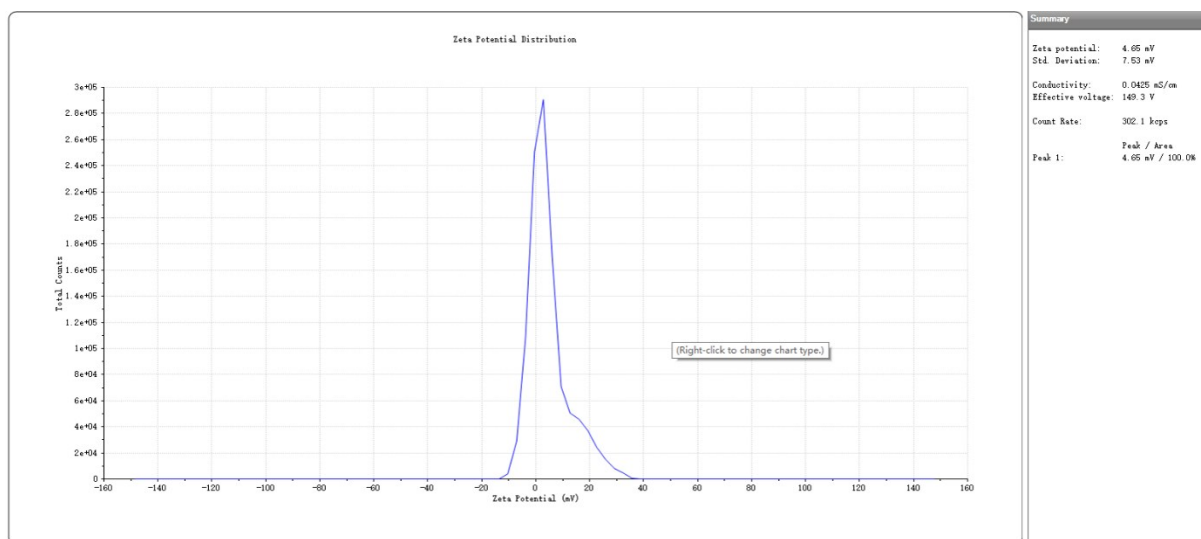

**Fig. S18** Zeta potential of MIL-101-SO<sub>3</sub>H-4 nanoparticles directly dispersed in water.



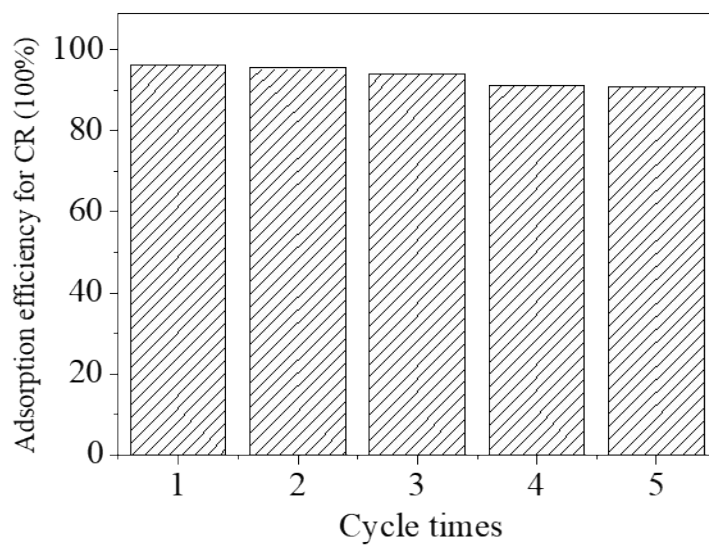

**Fig. S19** Recycle of the removal efficiency of MIL-101-SO<sub>3</sub>H-1 for CR.

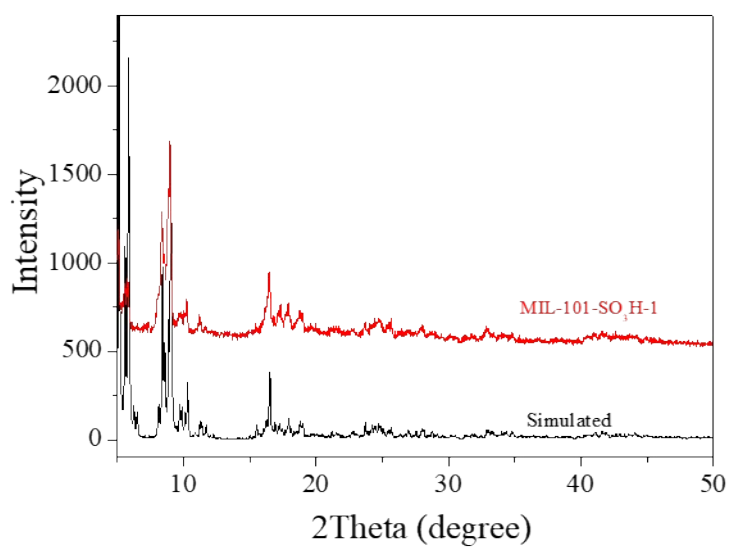

**Fig. S20** PXR D patterns of the MIL-101-SO<sub>3</sub>H-1 microparticles after regeneration.
